# Supplementary material for: Plasma Membrane Phosphatidylinositol-4-Phosphate Is Not Necessary for Candida albicans Viability yet Is Key for Cell Wall Integrity and Systemic Infection
Source: PubMed Central journal article supplement (PMC8942462; doi:10.1128/mbio.03873-21), 2022-02-15

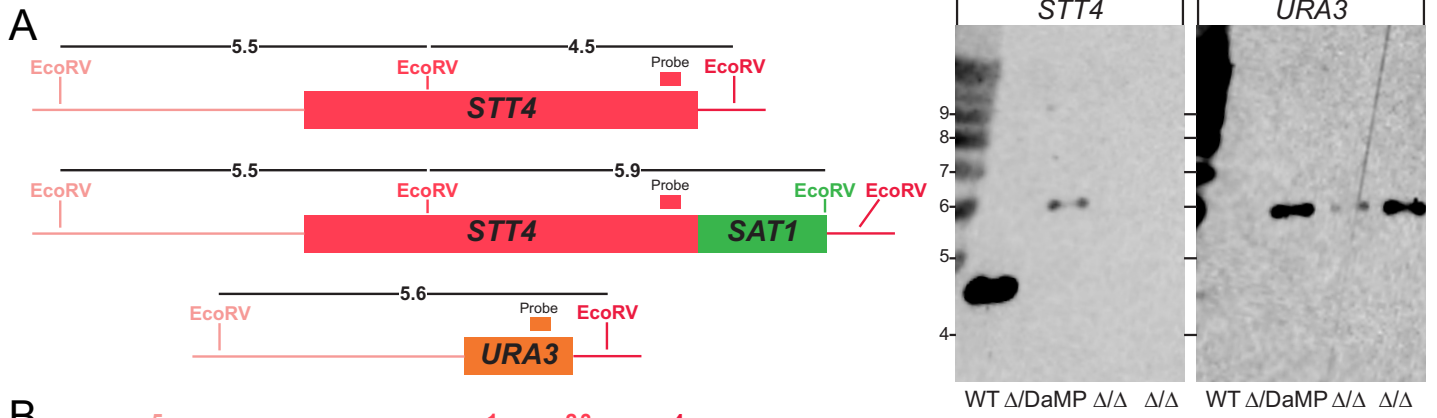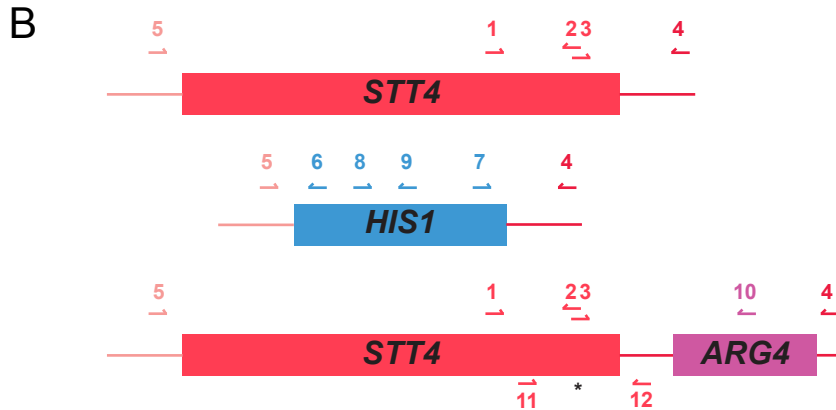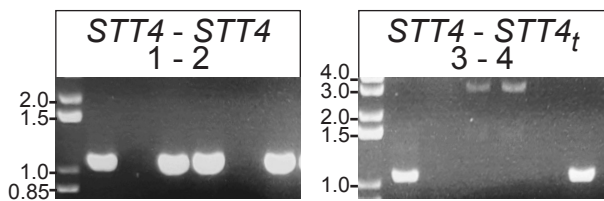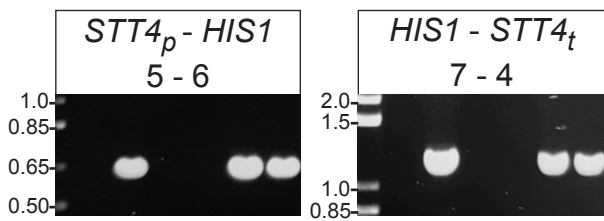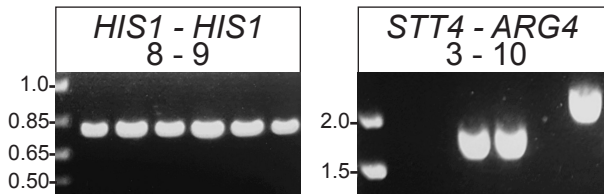

WT  
stt4 $\Delta/\Delta$ -1  
stt4 $\Delta/\Delta$ ::STT4  
stt4 $\Delta/\Delta$ ::STT4  
stt4 $\Delta/\Delta$ ::STT4  
stt4 $\Delta/\Delta$  RP10::STT4

WT  
stt4 $\Delta/\Delta$ -1  
stt4 $\Delta/\Delta$ ::STT4  
stt4 $\Delta/\Delta$ ::STT4  
stt4 $\Delta/\Delta$ ::STT4  
stt4 $\Delta/\Delta$  RP10::STT4

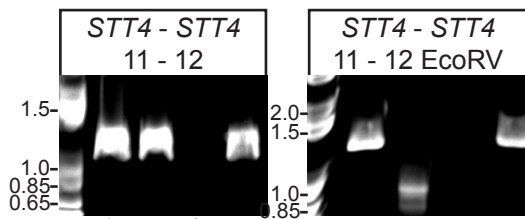

WT  
stt4 $\Delta/\Delta$ ::stt4\*  
stt4 $\Delta/\Delta$

WT  
stt4 $\Delta/\Delta$ ::stt4\*  
stt4 $\Delta/\Delta$

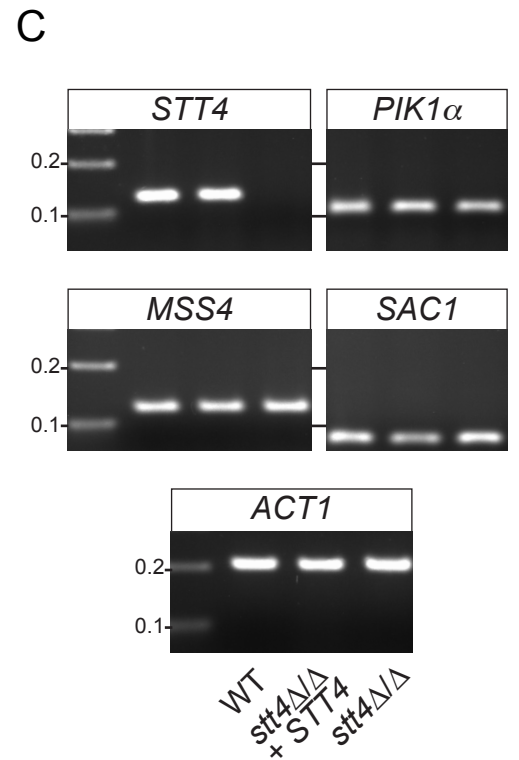

Supplement: mbio.03873-21-sf002.pdf [file mbio.03873-21-sf002.pdf]
