# Supplementary material for: Plasma Membrane Phosphatidylinositol-4-Phosphate Is Not Necessary for Candida albicans Viability yet Is Key for Cell Wall Integrity and Systemic Infection
Source: PubMed Central journal article supplement (PMC8942462; doi:10.1128/mbio.03873-21), 2022-02-15

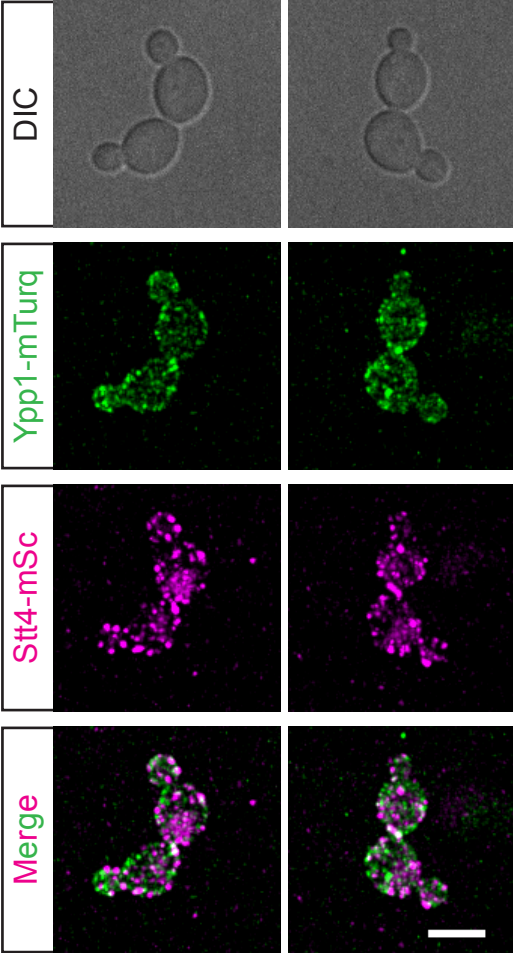

Supplement: mbio.03873-21-sf007.pdf [file mbio.03873-21-sf007.pdf]
