# Supplementary material for: Plasma Membrane Phosphatidylinositol-4-Phosphate Is Not Necessary for Candida albicans Viability yet Is Key for Cell Wall Integrity and Systemic Infection
Source: PubMed Central journal article supplement (PMC8942462; doi:10.1128/mbio.03873-21), 2022-02-15
Supplement: mbio.03873-21-st001.pdf [file mbio.03873-21-st001.pdf]

**Table S1. Strains, plasmids and primers used in this study.****A) Strains**

| Strain | GENOTYPE                                                                                                                                            | SOURCE     |
|--------|-----------------------------------------------------------------------------------------------------------------------------------------------------|------------|
| BWP17  | <i>ura3Δ::λimm434/ura3Δ::λimm434 his1Δ::hisG/his1Δ::hisG arg4Δ::hisG/arg4Δ::hisG</i>                                                                | (1)        |
| PY173  | <i>ade2Δ::hisG/ade2Δ::hisG ura3Δ::λimm434/ura3Δ::λimm434 his1Δ::hisG/his1Δ::hisG arg4Δ::hisG/arg4Δ::hisG ENO1/eno1::ENO1-tetRSchAP4AD-3xHA-ADE2</i> | (2)        |
| PY1206 | Same as BWP17 with <i>RPS1::ARG4-pADH1-GFP-(PH<sup>Plcδ</sup>)<sub>2</sub>-GFP</i>                                                                  | (2)        |
| PY2578 | Same as PY173 with <i>RPS1::ARG4-pADH1-PH<sup>FAPP1[E50A,H54A]</sup>-GFP</i>                                                                        | (3)        |
| PY2626 | Same as PY173 with <i>RPS1::ARG4-pACT1-GFP-(PH<sup>OSH2[H340R]</sup>)<sub>2</sub>-GFP</i>                                                           | (3)        |
| PY3239 | Same as BWP17 with <i>RPS1::ARG4-pACT1-GFP-yeLactC2</i>                                                                                             | (4)        |
| PY3857 | Same as BWP17 with <i>efr3Δ::HIS1/EFR3</i>                                                                                                          | This study |
| PY3859 | Same as BWP17 with <i>ypp1Δ::HIS1/YPP1</i>                                                                                                          | This study |
| PY3915 | Same as BWP17 with <i>efr3Δ::HIS1/efr3Δ::URA3</i>                                                                                                   | This study |
| PY3918 | Same as BWP17 with <i>ypp1Δ::HIS1/ypp1Δ::URA3</i>                                                                                                   | This study |
| PY3933 | Same as PY3915 with <i>RPS1::ARG4-pADH1-PH<sup>FAPP1[E50A,H54A]</sup>-GFP</i>                                                                       | This study |
| PY3935 | Same as PY3915 with <i>RPS1::ARG4-pADH1-GFP-(PH<sup>Plcδ</sup>)<sub>2</sub>-GFP</i>                                                                 | This study |
| PY3947 | Same as PY3915 with <i>RPS1::ARG4-pACT1-GFP-(PH<sup>OSH2[H340R]</sup>)<sub>2</sub>-GFP</i>                                                          | This study |
| PY3950 | Same as PY3918 with <i>RPS1::ARG4-pACT1-GFP-(PH<sup>OSH2[H340R]</sup>)<sub>2</sub>-GFP</i>                                                          | This study |
| PY3951 | Same as PY3918 with <i>RPS1::ARG4-pADH1-PH<sup>FAPP1[E50A,H54A]</sup>-GFP</i>                                                                       | This study |
| PY3958 | Same as PY3918 with <i>RPS1::ARG4-pADH1-GFP-(PH<sup>Plcδ</sup>)<sub>2</sub>-GFP</i>                                                                 | This study |
| PY4033 | Same as PY3918 with <i>RPS1::ARG4</i>                                                                                                               | This study |
| PY4036 | Same as PY3915 with <i>RPS1::ARG4</i>                                                                                                               | This study |
| PY4039 | Same as PY3915 with <i>RPS1::ARG4-EFR3pEFR3</i>                                                                                                     | This study |
| PY4040 | Same as PY3918 with <i>RPS1::ARG4-YPP1pYPP1</i>                                                                                                     | This study |
| PY4124 | Same as PY3915 with <i>RPS1::ARG4-pACT1-GFP-yeLactC2</i>                                                                                            | This study |
| PY4131 | Same as PY3918 with <i>RPS1::ARG4-pACT1-GFP-yeLactC2</i>                                                                                            | This study |
| PY4330 | Same as BWP17 with <i>stt4Δ::URA3/STT4</i>                                                                                                          | This study |
| PY4335 | Same as BWP17 with <i>STT4::SAT1 (stt4-DAmP)/STT4</i>                                                                                               | This study |
| PY4339 | Same as PY4335 with <i>stt4Δ::URA3/STT4::SAT1 (stt4-DAmP1)</i>                                                                                      | This study |
| PY4340 | Same as PY4335 with <i>stt4Δ::URA3/STT4::SAT1 (stt4-DAmP2)</i>                                                                                      | This study |
| PY4341 | Same as PY4335 with <i>stt4Δ::URA3/STT4::SAT1 (stt4-DAmP3)</i>                                                                                      | This study |
| PY4377 | Same as PY4339 with <i>stt4Δ::HIS1/stt4Δ::URA3</i>                                                                                                  | This study |
| PY4378 | Same as PY4339 with <i>stt4Δ::HIS1/stt4Δ::URA3</i>                                                                                                  | This study |
| PY4414 | Same as PY4377 with <i>RPS1::ARG4</i>                                                                                                               | This study |
| PY4433 | Same as PY4377 with <i>RPS1::ARG4-STT4pSTT4</i>                                                                                                     | This study |
| PY4861 | <i>ura3Δ::λ imm434/ura3Δ::λ imm434 his1::hisG/HIS1::his1::hisG arg4::hisG/ARG4::URA3::arg4::hisG</i>                                                | (5)        |
| PY5027 | Same as PY4377 with <i>stt4Δ::HIS1/stt4Δ::SAT</i>                                                                                                   | This study |

|        |                                                                                               |            |
|--------|-----------------------------------------------------------------------------------------------|------------|
| PY5040 | Same as PY5027 with <i>RPS1::URA3</i>                                                         | This study |
| PY5111 | Same as PY5040 with <i>RPS1::ARG4</i>                                                         | This study |
| PY5119 | Same as PY5040 with <i>stt4::STT4pSTT4-ARG4/stt4Δ::SAT</i>                                    | This study |
| PY5131 | Same as PY5119 with <i>his1::HIS1</i>                                                         | This study |
| PY5132 | Same as PY5119 with <i>his1::HIS1</i>                                                         | This study |
| PY5169 | Same as PY5040 with<br><i>RPS1::ARG4-pACT1-GFP-(PH<sup>OSH2[H340R]</sup>)<sub>2</sub>-GFP</i> | This study |
| PY5174 | Same as PY5040 with <i>RPS1::ARG4-pACT1-GFP-yeLactC2</i>                                      | This study |
| PY5552 | Same as PY5040 with<br><i>RPS1::ARG4-pADH1-PH<sup>FAPP1[E50A,H54A]</sup>-GFP</i>              | This study |
| PY5554 | Same as PY5040 with <i>RPS1::ARG4-pADH1-GFP-(PH<sup>Plcδ</sup>)<sub>2</sub>-GFP</i>           | This study |
| PY5574 | Same as PY3859 with <i>YPP1::3x-mSc- ARG4/ypp1Δ::HIS1</i>                                     | This study |
| PY5587 | Same as BWP17 with <i>STT4::3x-mSc-cdHIS1/STT4</i>                                            | This study |
| PY5599 | Same as PY3857 with <i>EFR3::3x-mSc- ARG4/efr3Δ::HIS1</i>                                     | This study |
| PY5601 | Same as PY4330 with <i>STT4::3x-mSc-cdHIS1/stt4Δ::URA3</i>                                    | This study |
| PY5757 | Same as PY5040 with<br><i>stt4::STT4pSTT4[G1180D]-ARG4/stt4Δ::SAT</i>                         | This study |
| PY5808 | Same as PY5757 with<br><i>stt4::STT4pSTT4[G1180D]-SAT1/stt4Δ::HIS1</i>                        | This study |
| PY5839 | Same as PY5808 with<br><i>RPS1::ARG4-pACT1-GFP-(PH<sup>OSH2[H340R]</sup>)<sub>2</sub>-GFP</i> | This study |
| PY5903 | Same as PY5808 with <i>RPS1::ARG4-pACT1-GFP-yeLactC2</i>                                      | This study |
| PY6134 | Same as PY5040 with <i>YPP1::3x-mSc-ARG4</i>                                                  | This study |
| PY6136 | Same as PY3915 with <i>YPP1::3x-mSc-ARG4</i>                                                  | This study |
| PY6138 | Same as PY3919 with <i>EFR3::3x-mSc-ARG4</i>                                                  | This study |
| PY6140 | Same as PY5040 with <i>EFR3::3x-mSc-ARG4</i>                                                  | This study |
| PY6142 | Same as PY3915 with <i>STT4::3x-mSc-ARG4</i>                                                  | This study |
| PY6144 | Same as PY3919 with <i>STT4::3x-mSc-ARG4</i>                                                  | This study |
| PY6193 | Same as BWP17 with <i>STT4::3x-mSc-ARG4</i>                                                   | This study |
| PY6195 | Same as BWP17 with <i>YPP1::3x-mSc-ARG4</i>                                                   | This study |
| PY6197 | Same as BWP17 with <i>EFR3::3x-mSc-ARG4</i>                                                   | This study |
| PY6201 | Same as PY5587 with <i>YPP1::mTurq-ARG4</i>                                                   | This study |

## B) Plasmids

| Plasmid                                                          | Source                                                         |
|------------------------------------------------------------------|----------------------------------------------------------------|
| pExpARG-pADH1-GFP-(PH <sup>OSH2</sup> [H340R]) <sub>2</sub> -GFP | (3)                                                            |
| pExpARG-pADH1-PH <sup>FAPP1</sup> [E50A, H54A]-GFP               | (3)                                                            |
| pExpARG                                                          | (3)                                                            |
| pExpARG-pACT1-GFP-yeLactC2                                       | (4)                                                            |
| pExpARG-pADH1-GFP-PH <sup>Plcδ</sup> -PH <sup>Plcδ</sup> -GFP    | (2)                                                            |
| pGEM- <i>HIS1</i>                                                | (1)                                                            |
| pGEM- <i>URA3</i>                                                | (1)                                                            |
| pFA- <i>SAT1</i>                                                 | (6)                                                            |
| pFA- <i>HIS1</i>                                                 | (6)                                                            |
| pFA- <i>URA3</i>                                                 | (6)                                                            |
| pFA- <i>ARG4</i>                                                 | (6)                                                            |
| pFA-3x- <i>mSc-ARG4</i>                                          | (7)                                                            |
| pFA-3x- <i>mSc-cdHIS1</i>                                        | (C. Puerner, M. Bassilana, and R. A. Arkowitz, in preparation) |
| pExpARG4-p <i>EFR3-EFR3</i>                                      | This study                                                     |
| pExpARG4-p <i>YPP1-YPP1</i>                                      | This study                                                     |
| pExpARG4-p <i>STT4-STT4</i>                                      | (2)                                                            |
| pExpARG4-p <i>STT4-STT4-STT4t::ARG4</i>                          | This study                                                     |
| pExpARG4-p <i>STT4-STT4*-STT4t::ARG4</i>                         | This study                                                     |
| pFA- <i>GFPY-NAT</i>                                             | (8)                                                            |
| pFA- <i>mTurq-ARG4</i>                                           | (C. Puerner, M. Bassilana, and R. A. Arkowitz, in preparation) |

### C) Primers

| Primer             | Sequence 5'→3'                                                                                                               |
|--------------------|------------------------------------------------------------------------------------------------------------------------------|
| CaEfr3mKO          | ccttttacctagaaaggatctttgacttgggtatctttgca<br>actgtctctctctcgcttttagcttaacaacaacgcagcT<br>TTCCCAGTCACGACGTT                   |
| CaEfr3pKO          | cttttctatttggttaattaaatcctgttttgattcaatagt<br>ttcttcaacttccagatccaagaatgaatttgtttcaacat<br>TGTGGAATTGTGAGCGGATA              |
| CaEfr3mXFPS2       | ggataaaaaaaaaatgcagtaaattgttccttttacctagaaag<br>gtatctttgacttgggtatctttgcaactgtctctctctcgc<br>tttagcTCTGATATCATCGATGAATTCGAG |
| CaEfr3pXFPS1       | gtggtgaataaaaaatgcaaaactacagatggtgattcaat<br>ttaaagtggctcttgaaagtgaagacgaagctgcggttggtg<br>ttGGTGCTGGCGCAGGTGCTTC            |
| CaEfr3m127         | CTCTACGAGTGGATGCATA                                                                                                          |
| CaEfr3m3118        | CCTCAAACCTTACACACTCTTCC                                                                                                      |
| CaEfr3m3183NotI    | TATAGCGGCCGCctgcaaataaggggactcttaac                                                                                          |
| CaEfr3p595         | GCAAACAACCCACAAAGCA                                                                                                          |
| CaEfr3p1304        | CGTCCACTGGAGAACAAT                                                                                                           |
| CaEfr3p1980        | GGATGAGCAATATAGTCAT                                                                                                          |
| CaEfr3p2593        | CGAACTGTCGATAGTGTT                                                                                                           |
| CaEfr3p2692        | ATGTCAACACATAGGGGTA                                                                                                          |
| CaEfr3pup100       | TTCATCAAGAATATCCTT                                                                                                           |
| CaEfr3pup960XhoI   | GCCTCGAGgccccactcccactcccccaac                                                                                               |
| CaStt4mKO          | ctatagataaacatacactattaacgcctccactagtaagg<br>aataccattggtaagtctttggaattcatTTTCCCAGTCAC<br>GACGTT                             |
| CaStt4pKO          | cagaaagaacagaaaagctatggattattctggtgattacc<br>gtggctcaattcgtgctgaagcccttaagTGTGGAATTGTG<br>AGCGGATA                           |
| CaStt4mXFPS2       | GGTTGCAGCCAAAAACACGAGCGGATAACAAAGTCCAATGT<br>CAATAATTACTATAGATAAACATACTATTAACGCCTCCA<br>TCTGATATCATCGATGAATTCGAG             |
| CaStt4pXFPS1       | CTTTAGAAAATTGATCAAGAAATCGATGGAAAGTTTCTACA<br>CTAAAGGTTATGATGAATTCCAAAGACTTACCAATGGTATT<br>CCTTACGGTGCTGGCGCAGGTGCTTC         |
| CaStt4G1810DmEcoRV | GGTGCAGCCTCAAACCTAACCCCATCAGGAACGATATCAAA<br>ACAGAACCCAAAATCAATATG                                                           |
| CaStt4G1810DpEcoRV | CATATTGATTTTGGGTTCTGTTTTGATATCGTTCCTGATGG<br>GGTTAGGTTTGGAGCTGCACC                                                           |
| CaStt4m160         | GTAATTTGGGAGTGGCCG                                                                                                           |
| CaStt4m4255        | CTGATAGCAGGTAATGGGTC                                                                                                         |
| CaStt4m5056        | CATGGAAATCAATTGTAAGGC                                                                                                        |
| CaStt4m5130        | GGAGCAGTTGCAGTAACT                                                                                                           |
| CaStt4m5543        | CCTTTCACACACAACCTCTTC                                                                                                        |
| CaStt4m5857        | ttgtaacaaaggttgcagcc                                                                                                         |
| CaStt4m6102        | CCTTGTGGTTGCTATTTGG                                                                                                          |
| CaStt4m6286        | GCTGGTCTTGGGGGGTTGG                                                                                                          |
| CaStt4m6784        | ATTTTCATATCCAGCAATTATGCC                                                                                                     |
| CaStt4m6924        | CCACTTCATTAACAAGCC                                                                                                           |

|                      |                                                                                                                     |
|----------------------|---------------------------------------------------------------------------------------------------------------------|
| CaStt4m4115KI        | CTAGTATCTGAAGGATTCATTGAATGTAACCACACAGTAAA<br>TTTACAAATCTCATCATCCATAAAATATAAAAAGAATTTTca<br>tagcttttctgttctttctg     |
| CaStt4m4864KI        | GATTTTAAATGTCGCCATAAATGGTGCCTTGGCATGTGATT<br>GTAATGGTCTACCCAGTTTACGATTAATATCAATAACAACc<br>atagcttttctgttctttctg     |
| CaStt4m6600NotI      | TCTGCGGCCGcgtggatcacaacattgtg                                                                                       |
| CaStt4mupSacII       | TTAccgcggCATAGCTTTTCTGTTCTTTCTGTTTTCTTG                                                                             |
| CaStt4p4100          | CATTGCGTACCGATGAAG                                                                                                  |
| CaStt4p4884          | GCCATCCAATCCTGATGGGGTTG                                                                                             |
| CaStt4p5199          | GGGAAGAGAAGCTGTTAATGG                                                                                               |
| CaStt4p5439          | GTTCTGGTGGGGTTAGG                                                                                                   |
| CaStt4p5488          | GGAGGTAATGATCAAACCTC                                                                                                |
| CaStt4p5519          | GGTTTGAAGAGTTGTGTGTG                                                                                                |
| CaStt4p5740          | GGTTATGATGAATTCCAAG                                                                                                 |
| CaStt4p5857          | ttgtaacaaaggttgcagcc                                                                                                |
| CaStt4p5974          | CGGTCAATAATCTTCGGGATTAAG                                                                                            |
| CaStt4pup168         | CCCACCACCAACGCAATTATC                                                                                               |
| CaStt4pup325         | caatcacgtgcattctccac                                                                                                |
| CaStt4pup617S1       | GAGACACTTTGATTGAAACTTATTCTTAAATTGGGTTTCTC<br>AAAATATAGGAATTA AAAAGGGGTTTATGTATAGAGTGTTA<br>Ggaagcttcgtacgctgcaggtc  |
| CaStt4pupSpeI        | GGCactagtCCCGCTCCCAACTAATCAAC                                                                                       |
| CaStt4term_mAsclPmeI | agaatagaggaagaaaaaaaagggtTTTaaaccatGgcGCG<br>CCagatctcaacgatacttgtacg                                               |
| CaStt4term_pAsclPmeI | cgtacaagtatcgttgagatctGGCGCgcCatgggttAAAc<br>ccttttttttcttctctattct                                                 |
| CaYpp1mKO            | attgattttttatataattctccttttttgatagctctgtttc<br>gctctttgtctattaagttcatcaaatataaattcccTTT<br>CCCAGTCACGACGTT          |
| CaYpp1pKO            | cacatcctattaagttgatcttttattttggcttttaatta<br>ttttaattcccaacattatagatgtatattgagagttcgTG<br>TGGAATTGTGAGCGGATA        |
| CaYpp1mXFPS2         | gctttctgtacatattttattgattttttatataattctcct<br>tttttgatagctctgtttcgtcttttgtctaTCTGATATCAT<br>CGATGAATTTCGAG          |
| CaYpp1pXFPS1         | gataaaatattattgacgaaaagtttatggagatgtattga<br>attagaagataaacgaccagttagggaatttatatttgatg<br>aacttGGTGCTGGCGCAGGTGCTTC |
| CaYpp1m87            | TTGTTGGAATTCCAATAC                                                                                                  |
| CaYpp1m3313          | ACTTACAAGGCTCATATC                                                                                                  |
| CaYpp1m3577NotI      | TATAGCGGCCGc aaacgaggaacaatcaaagtgtcg                                                                               |
| CaYpp1p503           | GTGCGGGGAACAATGGAGT                                                                                                 |
| CaYpp1p1173          | CAACCCATTGAAAAGTTTC                                                                                                 |
| CaYpp1p1929          | GAAGCATCGTCAACGCAAT                                                                                                 |
| CaYpp1p2637          | TCCACGTCATCAACATGAT                                                                                                 |
| CaYpp1p3073          | GGATATAATAATCCAGAA                                                                                                  |
| CaYpp1pup167         | CAGTTTAGCCGGTTGTCC                                                                                                  |
| CaYpp1pup962XhoI     | GCCTCGAGgtcacattaactcctatacttgc                                                                                     |

|                 |                                                                                                                    |
|-----------------|--------------------------------------------------------------------------------------------------------------------|
| CaARG4ExchS1    | atgtcacaacaacaagataaacaacctagtgaaaataaatt<br>atgggggtgggtcgtttcaccggtgccactgatccattgatgg<br>GAAGCTTCGTACGCTGCAGGTC |
| CaARG4ExchS2    | ttaacttaagattgatttttaatttttctaattgttttaaaa<br>cggcacttttagcagtaccaccaagagcatctcttctttcc                            |
| CaARG4Ascl-S1   | tctggcgcgccAAGCTTCGTACGCTGCAGGTC                                                                                   |
| CaARG4Pmel-S2   | agggtttaaacTCTGATATCATCGATGAATTCGAG                                                                                |
| CaARG4m537      | GTGCCCATCTAATAGGTTGAG                                                                                              |
| CaHIS1mup152    | CGAAATGGCCTCCCTAC                                                                                                  |
| CaHIS1m836      | tcgtccattacattaccg                                                                                                 |
| CaHIS1pStop1008 | CTTTAGATGGATCGACATTGG                                                                                              |
| CaHis1p214      | gacttgggtataactggg                                                                                                 |
| CaURA3mup270    | ggcactacagcaactttc                                                                                                 |
| CaURA3m81       | CATAAATTGGTTTTCTTCAGTTCC                                                                                           |
| CaURA3mSAT1     | tataattggccagtttttttcaaataagcattccaaccagc<br>atctctataccttttaccttcaatatctggatcCGTTAGTA<br>TCGAATCGACAGC            |
| CaURA3p751      | GAAGGTAAAAGGTATAGAAATGC                                                                                            |
| CaURA3pSAT1     | atgacagtcaacactaagacctatagtgagagagcagaaac<br>tcatgcctcaccagtagcacaacgattatttcgattaGATA<br>TCAAGCTTGCCTCGTC         |
| CaURA3pXhol     | gttgcgtgtagtgccattgaCtcgAGacactaattctgtatt<br>agtcattcc                                                            |
| CaRPS1p         | GAGGATTGAGCGTAAGTAG                                                                                                |
| CaSATDAmPmKO    | cgatgaattcgagctccaccgcggtggcgggcgcctctagaa<br>ctagtggatcccccgggctgcaggaccaccttgattgTTT<br>CCCAGTCACGACGTT          |
| CaSATDAmPmS2    | CGATGAATTTCGAGCTCCACCGCGGTGGCGGCCGCTCTAGAA<br>CTAGTGGATCCCCCGGGCTGCAGGACCACCTTTGATTGtct<br>gatatcatcgatgaattcgag   |
| CaSATDAmPpS1    | CAAGAAATCGATGGAAAGTTTCTACACTAAAGGTTATGATG<br>AATTCCAAGACTTACCAATGGTATTCCTTACTAgaagctt<br>cgtacgctgcaggtc           |
| CaSATm596       | GTTTTCCCACCCTACCCAT                                                                                                |
| CaSATm1638      | AATGCCGCCGAGAGTAAAG                                                                                                |
| CaSATp1315      | TCTACCAGAAGTGTGAGCC                                                                                                |
| CaSATp1734      | gtgaagtgtgaaggggggaga                                                                                              |
| CaSATp1315      | TCTACCAGAAGTGTGAGCC                                                                                                |
| CaSATp1734      | gtgaagtgtgaaggggggaga                                                                                              |
| CaGFPM106       | ccggagacagaaaatttg                                                                                                 |
| CamScarletm108  | CATGACCATTTCATTGAACCTTCC                                                                                           |
| CamTurq2m419    | GACCTAAAATATTACCATCTTC                                                                                             |
| CaACT1m-TM      | ACATTTGTGGTGAACAATGG                                                                                               |
| CaACT1p-TM      | ATGTTCCCAGGTATTGCTGA                                                                                               |
| CaALS3p-TM      | TTGGCAACGTGCACCTTTC                                                                                                |
| CaALS3m-TM      | GTGGTCACGGCGGTAGTACTG                                                                                              |
| CaECE1p-TM      | CCAGAAATTGTTGCTCGTGTTG                                                                                             |
| CaECE1m-TM      | CAGGACGCCATCAAAAACG                                                                                                |
| CaEFR3m-TM      | TCTTCCCATCATCTTCAACGT                                                                                              |
| CaEFR3p-TM      | ACAACCCACAAAGCAGCATA                                                                                               |

|                      |                               |
|----------------------|-------------------------------|
| CaHGC1p-TM           | AAAGCTGTGATTAAATCGGTTTTGA     |
| CaHGC1m-TM           | AATTGAGGACCTTTTGAATGGAAA      |
| CaHWP1p-TM           | CGGAATCTAGTGCTGTCGTCCTCT      |
| CaHWP1m-TM           | TAGGAGCGACACTTGAGTAATTGG      |
| CaMSS4m-TM           | AATCCCTCCATCATGACCATAAA       |
| CaMSS4p-TM           | AAATCTTTTGATAAACGTGCCCTTA     |
| CamSCARLETm-TM       | TTTTTGCATAACTGGACCATCTG       |
| CamSCARLETp-TM       | GTGGTGCTGTTACTGTTACTCAAGATAC  |
| CaPIK1 $\alpha$ m-TM | GCTGCGATTCTCATCTGATCAGC       |
| CaPIK1 $\alpha$ p-TM | CCCCTTCTATTACGGAGCAACTG       |
| CaSAC1m-TM           | TTCAACACCACCTCCCAGTGT         |
| CaSAC1p-TM           | CCACAGCAACAGATGGAECTCA        |
| CaSAP4p-TM           | TCCCTTTTCTTAACCTCTCTGAA       |
| CaSAP4m-TM           | AGCCGCTATACTTGGCCTTGT         |
| CaSAP5p-TM           | CAATTATTTGCTAACGTTTGGTCTACTAG |
| CaSAP5m-TM           | CTTCGCCGCTTTGAAAACC           |
| CaSAP6p-TM           | TCTCCAGGGTTTGTTACCTTAGACTT    |
| CaSAP6m-TM           | TTAGATTTCGGCAGTTGGATCATC      |
| CaSTT4m-TM1          | AGCCCATCAACACCATATTTTTCT      |
| CaSTT4p-TM1          | CCATTGATTTTGAAAGGGTTAAGTT     |
| CaSTT4m-TM2          | CGGTACGCAATGGTAATTTATTCAT     |
| CaSTT4p-TM2          | GATCGTGAATGGTCCGCAAT          |
| CaTDH3p-TM           | ATCCCACAAGGACTGGAGA           |
| CaTDH3m-TM           | GCAGAAGCTTTAGCAACGTG          |
| CaYPP1m-TM           | TGGTGTGGGTTGTTCTTTTTTC        |
| CaYPP1p-TM           | AAATGGTCCCATCGTCCAA           |

## References

1. Wilson RB, Davis D, Mitchell AP. 1999. Rapid hypothesis testing with *Candida albicans* through gene disruption with short homology regions. *J Bacteriol* 181:1868-74.
2. Vernay A, Schaub S, Guillas I, Bassilana M, Arkowitz RA. 2012. A steep phosphoinositide bis-phosphate gradient forms during fungal filamentous growth. *J Cell Biol* 198:711-30.
3. Ghugtyal V, Garcia-Rodas R, Seminara A, Schaub S, Bassilana M, Arkowitz RA. 2015. Phosphatidylinositol-4-phosphate-dependent membrane traffic is critical for fungal filamentous growth. *Proc Natl Acad Sci U S A* 112:8644-9.
4. Labbaoui H, Bogliolo S, Ghugtyal V, Solis NV, Filler SG, Arkowitz RA, Bassilana M. 2017. Role of Arf GTPases in fungal morphogenesis and virulence. *PLoS Pathog* 13:e1006205.
5. Bassilana M, Blyth J, Arkowitz RA. 2003. Cdc24, the GDP-GTP exchange factor for Cdc42, is required for invasive hyphal growth of *Candida albicans*. *Eukaryot Cell* 2:9-18.
6. Schaub Y, Dunkler A, Walther A, Wendland J. 2006. New pFA-cassettes for PCR-based gene manipulation in *Candida albicans*. *J Basic Microbiol* 46:416-29.
7. Silva PM, Puerner C, Seminara A, Bassilana M, Arkowitz RA. 2019. Secretory Vesicle Clustering in Fungal Filamentous Cells Does Not Require Directional Growth. *Cell Rep* 28:2231-2245 e5.
8. Milne SW, Cheetham J, Lloyd D, Aves S, Bates S. 2011. Cassettes for PCR-mediated gene tagging in *Candida albicans* utilizing nourseothricin resistance. *Yeast* 28:833-41.
